# Supplementary material
Source: PubMed Central journal article supplement (PMC2821215)
Supplement: NIHMS161845-supplement-01.pdf [file NIHMS161845-supplement-01.pdf]

## Supplementary Tables:

Supplementary table: Association of continuous-combined EPT use (progestin  $\geq$  25 days/month) and endometrial cancer (based on baseline questionnaire data)

| HT Type                    | Duration (Years) | N Ca (Co)   | OR (95% CI)*     | P Value |
|----------------------------|------------------|-------------|------------------|---------|
| <b>Never</b>               |                  | 55 (148043) | 1 (Ref)          |         |
| <b>Continuous-Combined</b> | < 5              | 12 (26941)  | 1.67 (0.85-3.28) |         |
|                            | 5-9              | 15 (36656)  | 1.58 (0.84-2.94) |         |
|                            | 10-14            | 6 (30004)   | 0.82 (0.34-1.99) |         |
|                            | 15+              | 10 (15163)  | 2.80 (1.38-5.70) |         |
|                            | Per 5 years      |             | 1.31 (1.07-1.61) | 0.0096  |
|                            |                  |             | P trend          | 0.085   |

\* Adjusted for age, race, reference year, menopause age, number of full-term pregnancies, age at the last full-term pregnancy, lifetime oral contraceptive use duration and body mass index  
Abbreviations: EPT: Estrogen-Progestin Therapy; OR: Odds Ratio; CI: Confidence Interval; Ca: Case; Co: Control; Ref: Reference Group; HT: Hormone Therapy; CTS: California Teachers Study
